# Supplementary material for: An ESIPT solvatochromic fluorescent and colorimetric probe for sensitive and selective detection of copper ions in environmental samples and cell lines
Source: Royal Society of Chemistry journal article supplement (doi:10.1039/d3an00870c), 2023-01-01
Supplement: d3an00870c1.pdf [file d3an00870c1.pdf]

## Supporting Information

### ESIPT solvatochromic fluorescent and colorimetric probe for sensitive and selective detection of copper ions in environmental samples and cell lines

Kondakamarla Imran <sup>1, #</sup>, Dheeraj Pandey <sup>1, #</sup>, Jasleen Kaur<sup>2</sup>, Saba Naqvi<sup>2</sup> and Abha Sharma<sup>1, \*</sup>

<sup>1</sup>Department of Medicinal Chemistry, National Institute of Pharmaceutical Education and Research, Raebareli, Transit Campus Lucknow, UP, India

<sup>2</sup>Department of Pharmacology & Toxicology/Regulatory Toxicology, National Institute of Pharmaceutical Education and Research, Raebareli, Transit Campus Lucknow, UP, India

\*Email: abha.sharma@niperraebareli.edu.in; abha.sharma@niperrbl.ac.in

#### Table of Content

1. Characterization data of compounds: Fig. S1-S12
2. UV spectra of selectivity QHS (10  $\mu$ M) against other analytes (100  $\mu$ M): Fig. S13
3. Fluorescence spectra of selectivity QHS (10  $\mu$ M) against other analytes: Fig S14
4. Various probes reported for the detection of Cu (II) ions: Table S1
5. EDX data of QHS alone and in combination with CuCl<sub>2</sub>: Fig S15
6. MTT assay results for 6 h: Fig S16
7. MTT assay results for 24 h: Fig S17
8. Cell lines assay for QHS alone: Fig S18
9. Cell lines assay for CuCl<sub>2</sub> alone: Fig S19
10. Cell lines assay for QHS and CuCl<sub>2</sub>: Fig S20
11. FTIR spectra of QHS alone: Fig S21
12. FTIR spectra of QHS and CuCl<sub>2</sub>: Fig S22
13. Mass spectra of QHS + Cu (II) complex: Figure S23

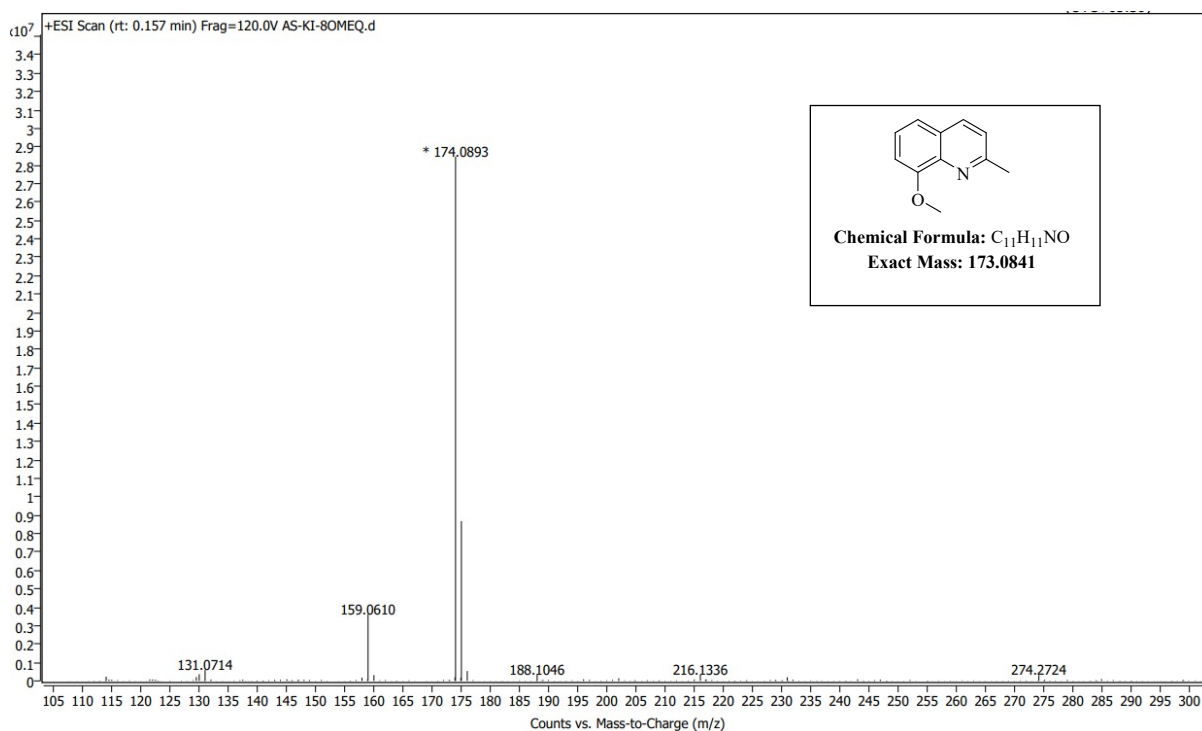

Fig S1. HR-MS Spectra of 8-Methoxy-2-Methyl Quinoline.

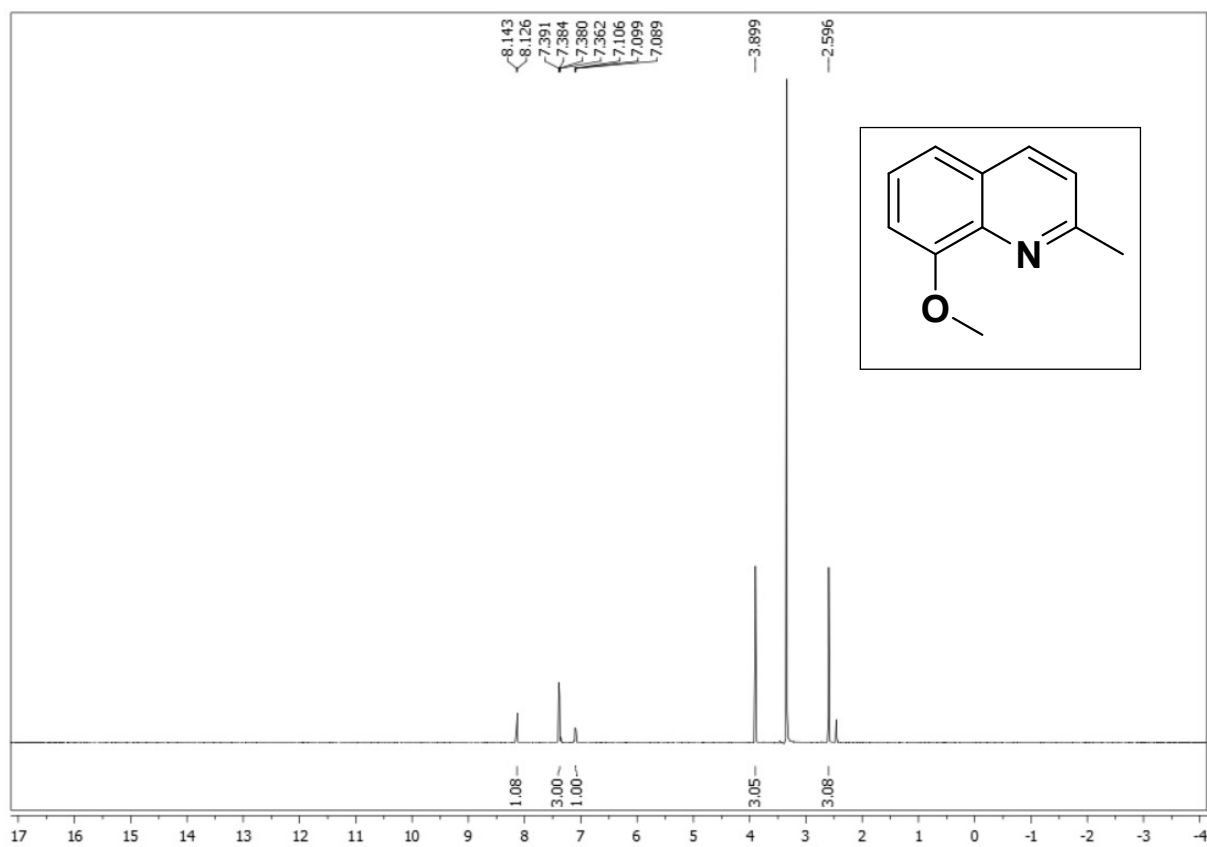

Fig S2. <sup>1</sup>H Spectra of 8-Methoxy-2-Methyl Quinoline.

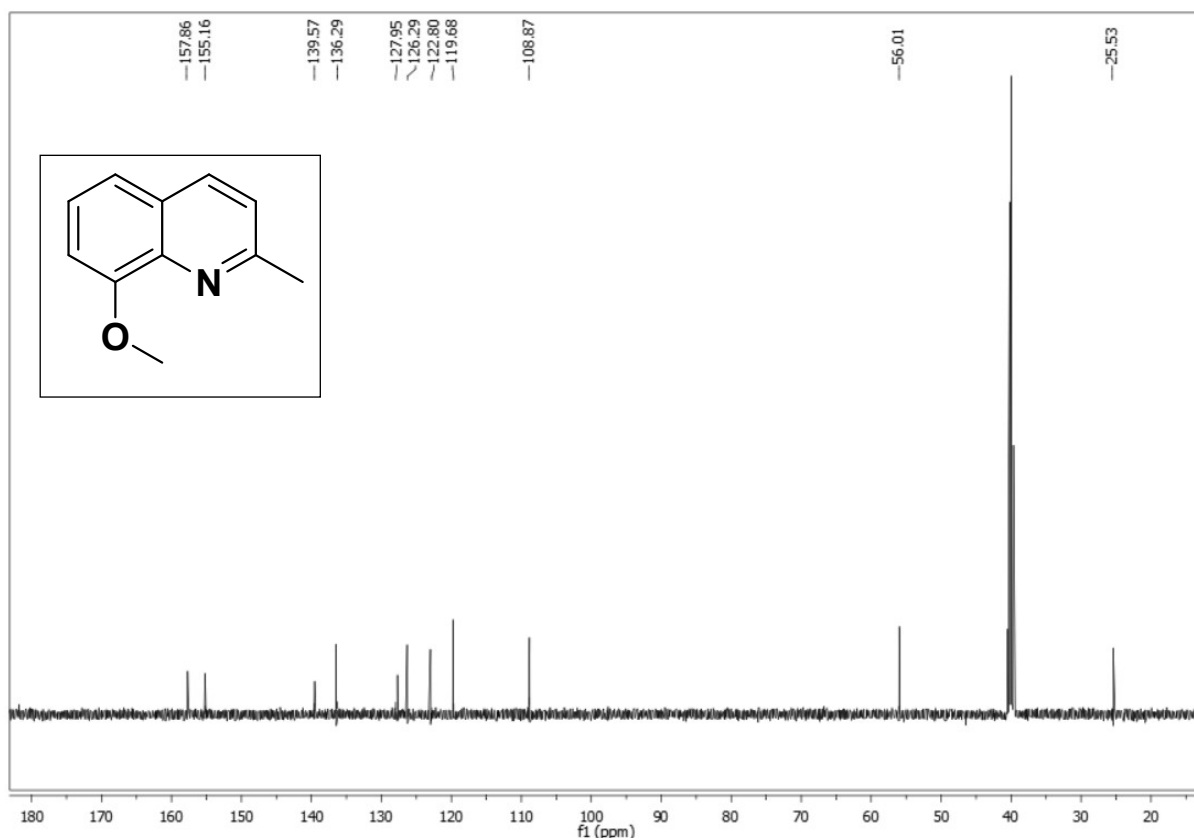

Fig S3.  $^{13}\text{C}$  Spectra of 8-Methoxy-2-Methyl Quinoline.

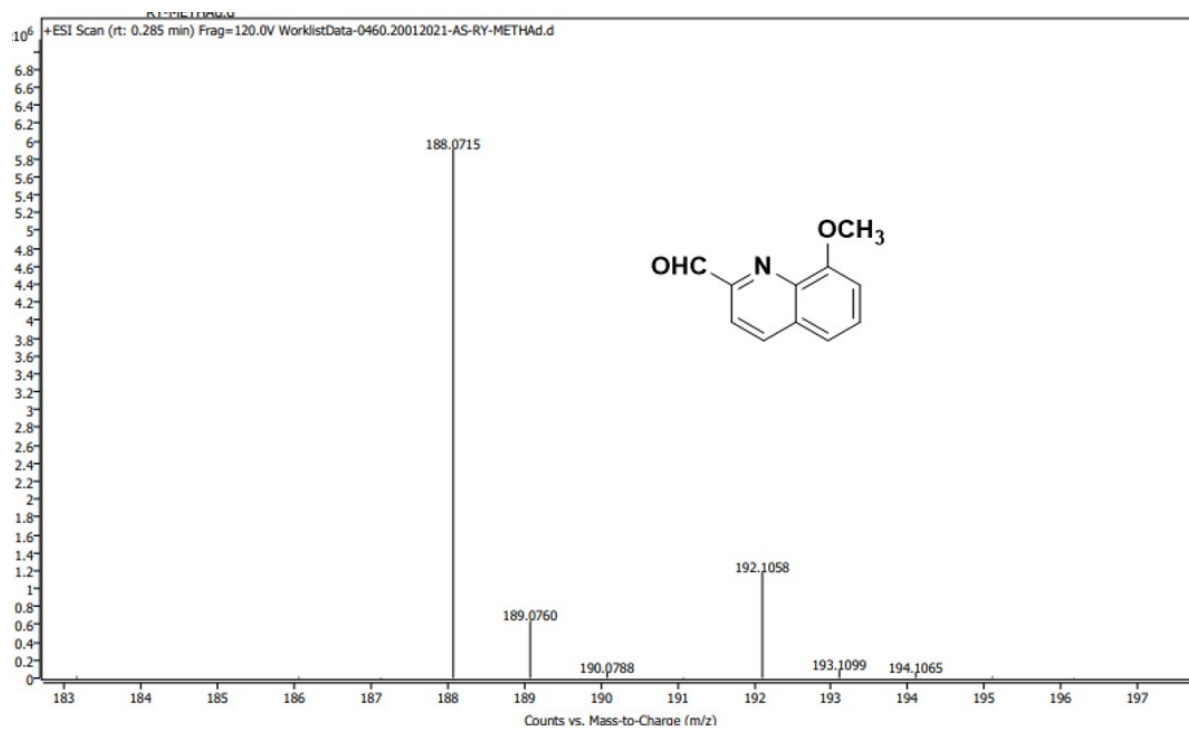

Fig S4. HR-MS Spectra of 8-methoxyquinoline-2-carbaldehyde.

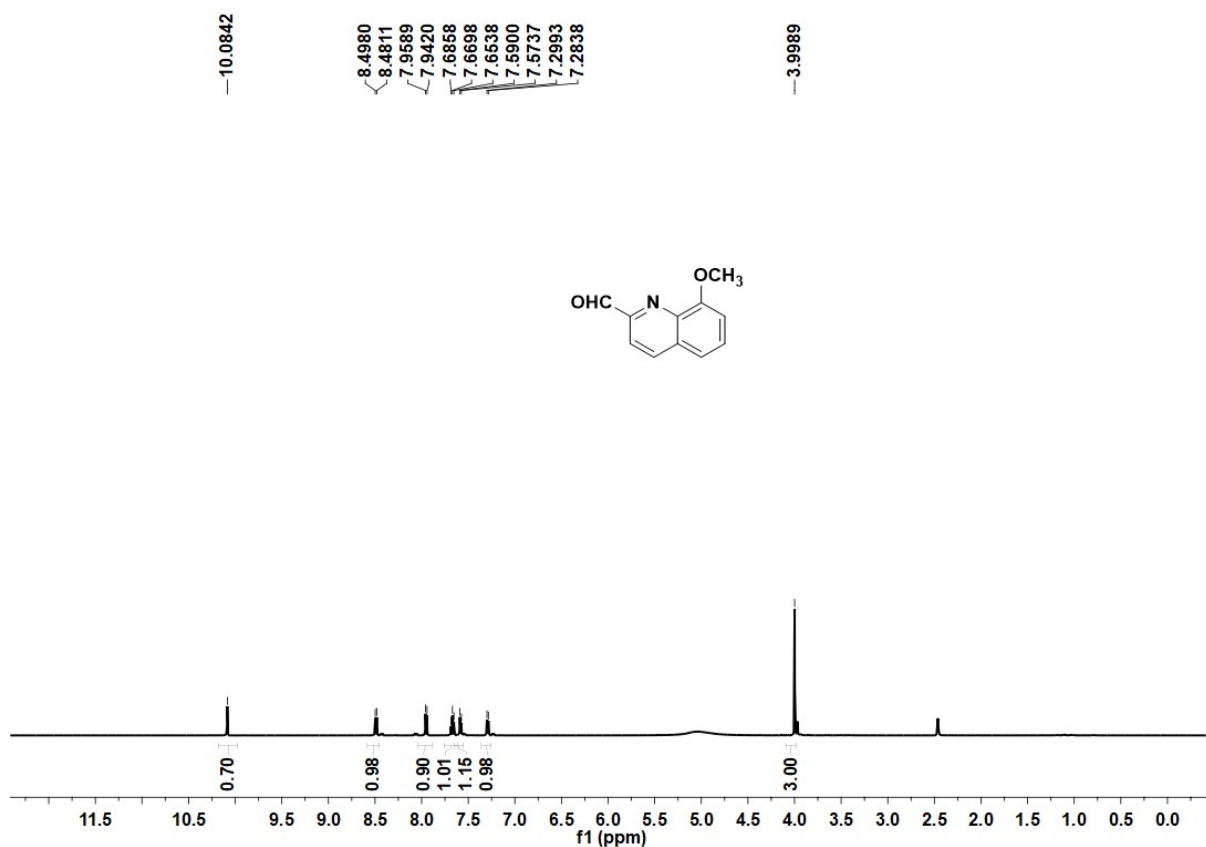

Fig S5.  $^1\text{H}$  Spectra of 8-methoxyquinoline-2-carbaldehyde.

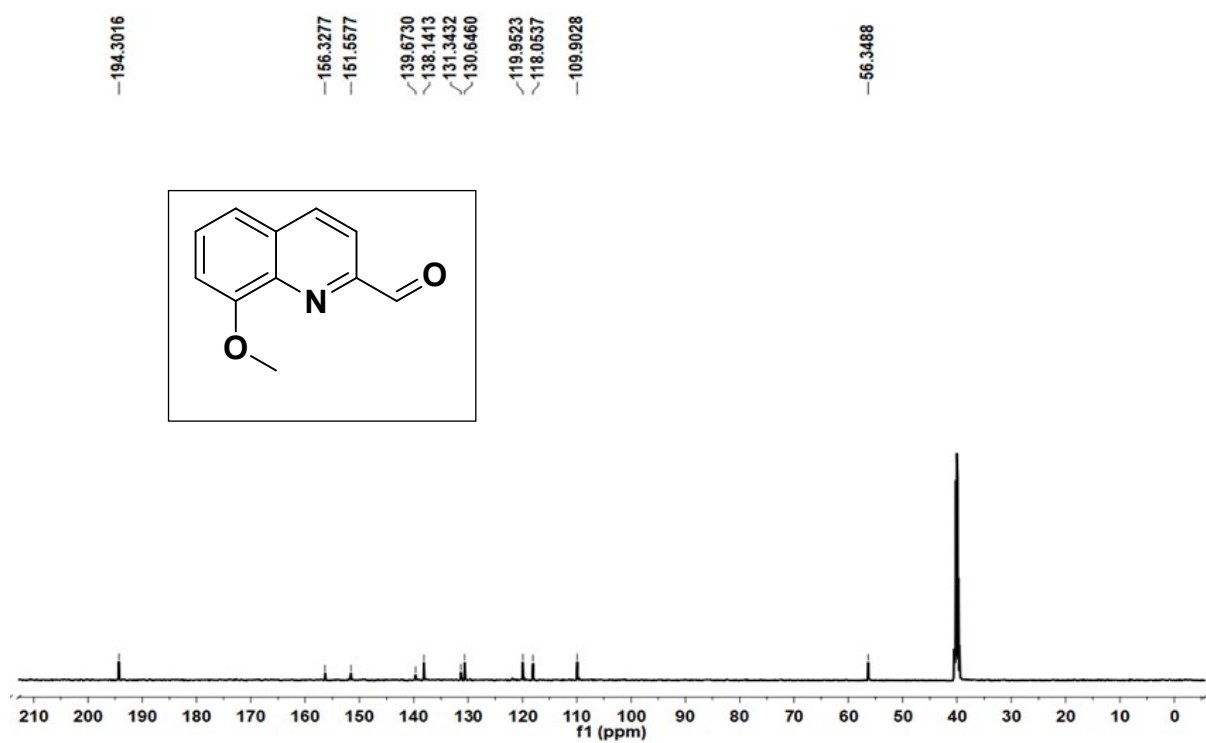

Fig S6.  $^{13}\text{C}$  Spectra of 8-methoxyquinoline-2-carbaldehyde.

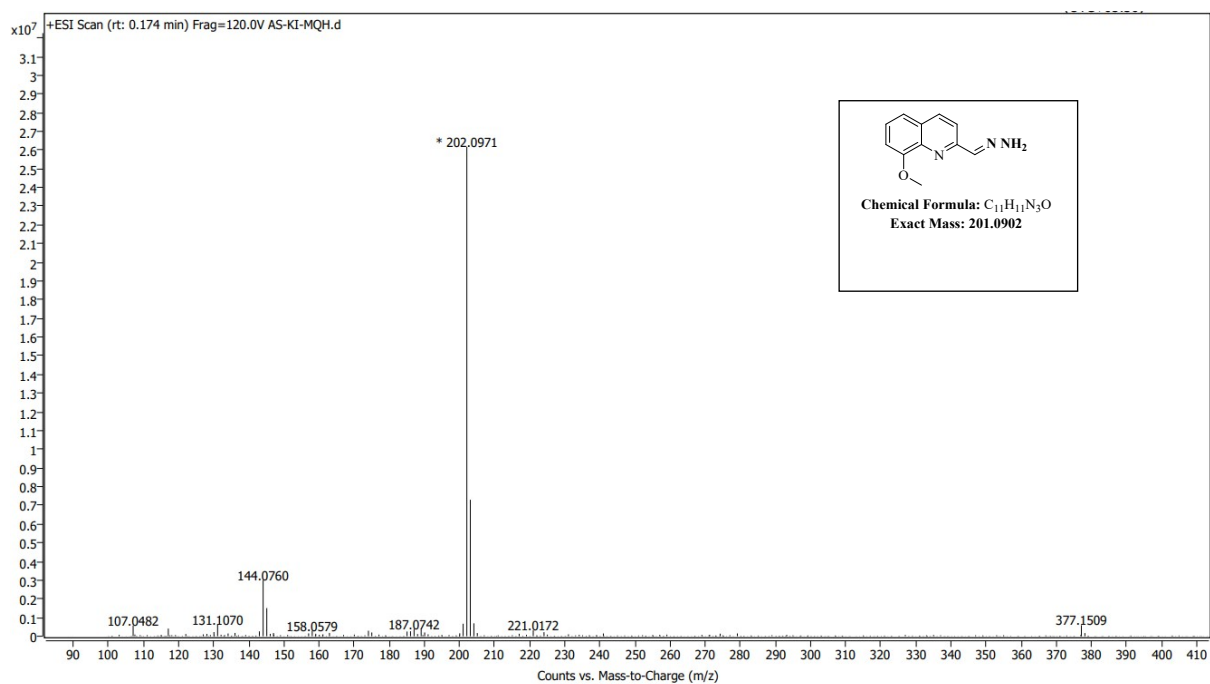

Fig S7. HR-MS spectra of 2-(hydrazineylidenemethyl)-8-methoxyquinoline.

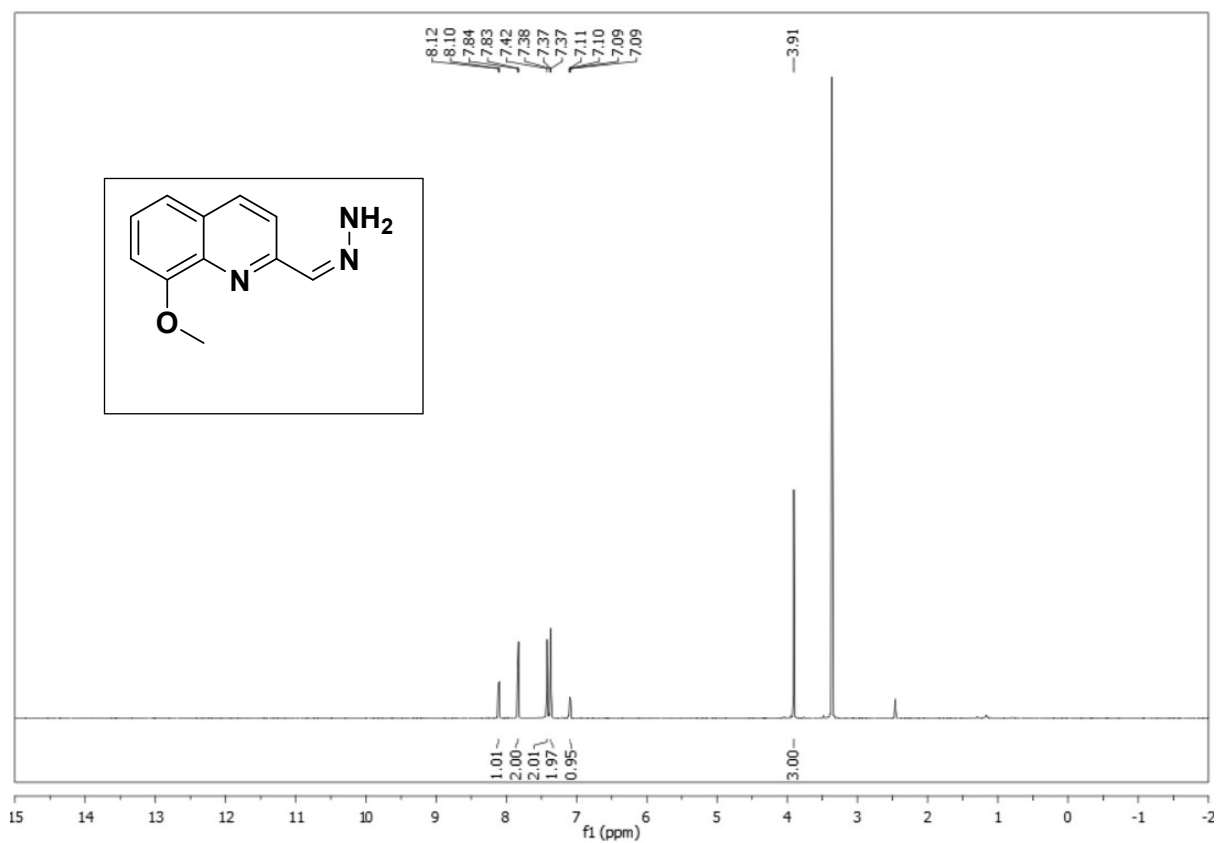

Fig S8. <sup>1</sup>H NMR spectra of 2-(hydrazineylidenemethyl)-8-methoxyquinoline.

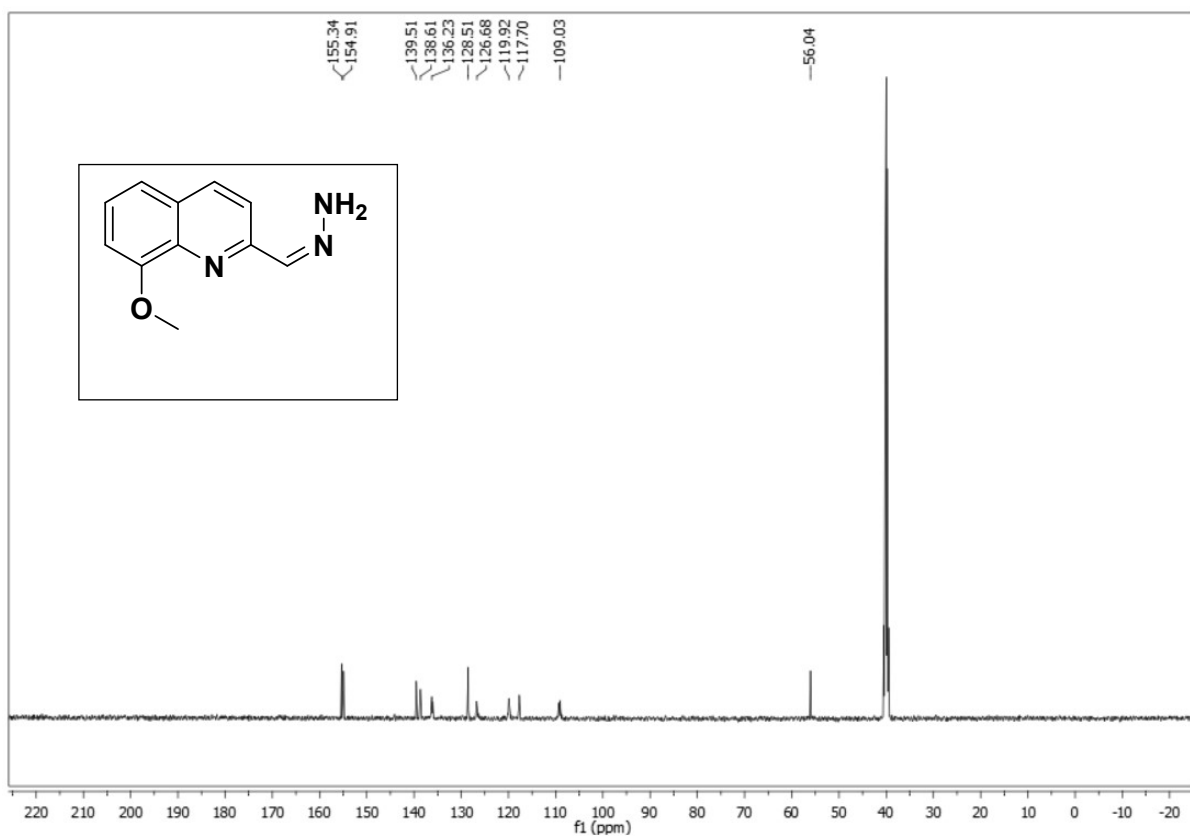

Fig S9. <sup>13</sup>C spectra of (hydrazineylidenemethyl)-8-methoxyquinoline.

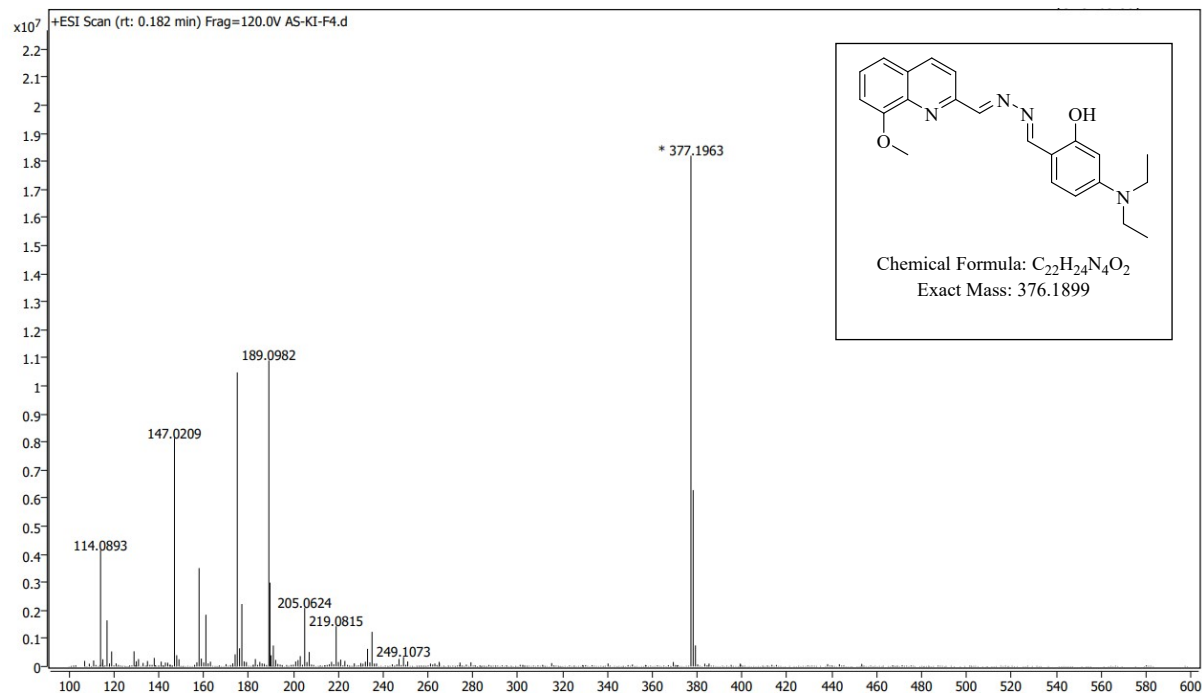

Fig S10. HR-MS spectra of QHS compound.

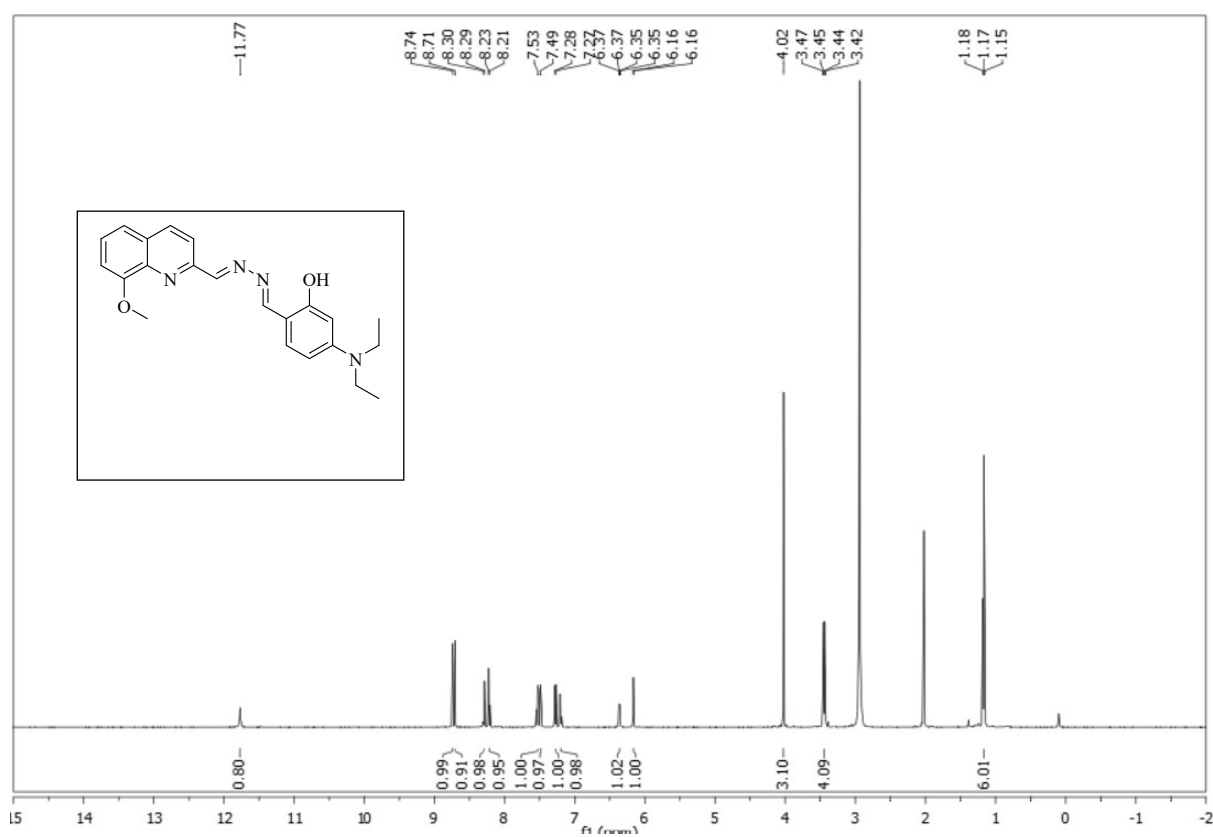

Fig S11.  $^1\text{H}$  NMR spectra of QHS compound.

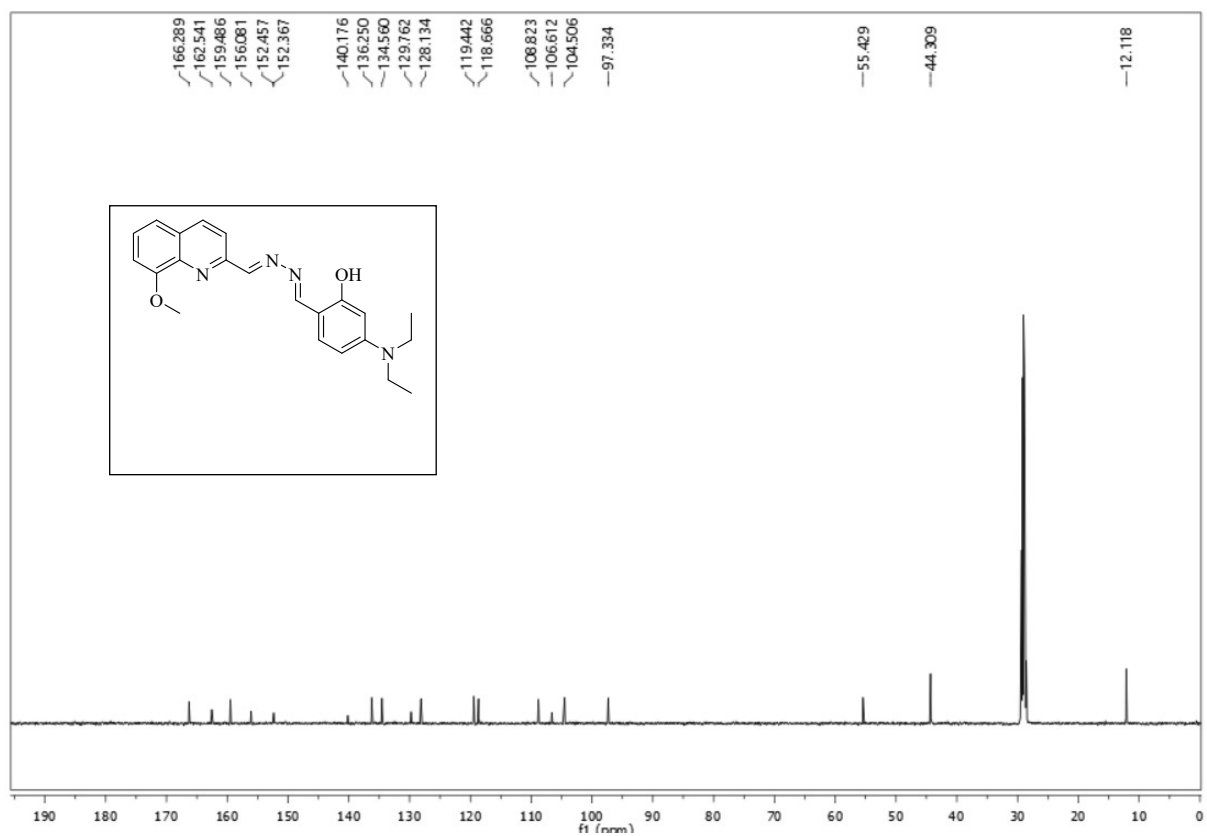

Fig S12.  $^{13}\text{C}$  NMR spectra of QHS compound.

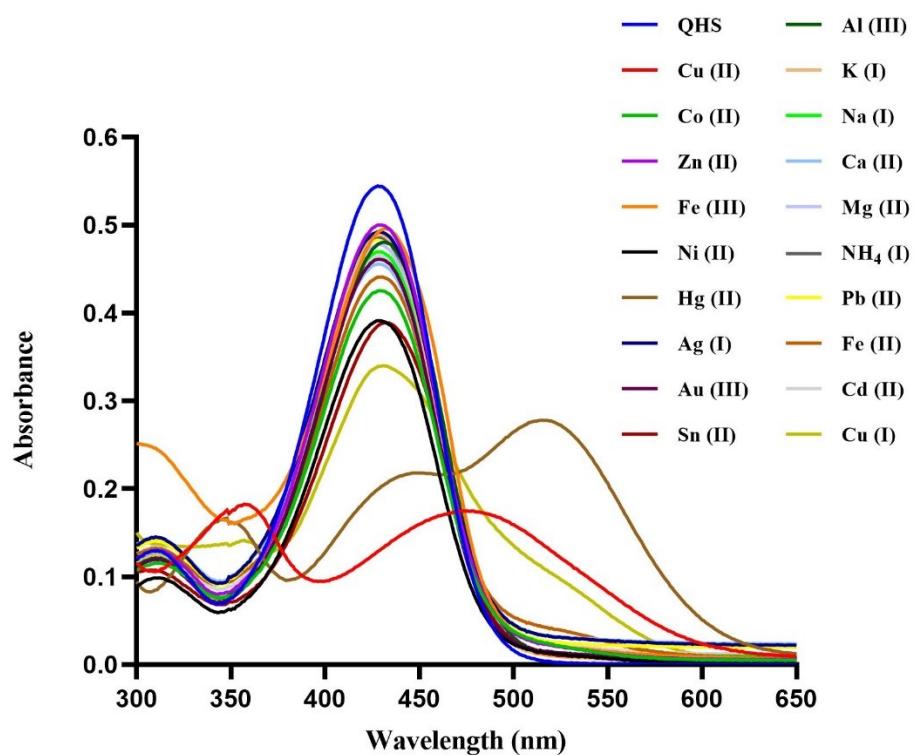

Fig S13. UV spectra of selectivity QHS (10  $\mu\text{M}$ ) against other analytes (100  $\mu\text{M}$ ).

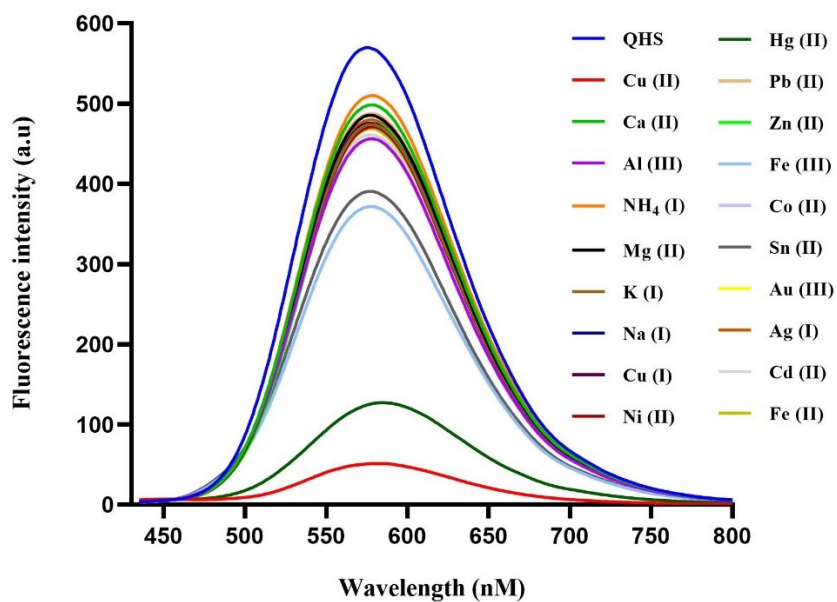

Fig S14. Fluorescence spectra of selectivity QHS (10  $\mu\text{M}$ ) against other analytes (100  $\mu\text{M}$ ).



Table S1. Various probes reported for the detection of Cu (II) ions

| S. No | Chemo sensor                                                                                                               | Solvent system                                | LOD (nM) | Binding Ratio (Sensor: Metal) | Ref . |
|-------|----------------------------------------------------------------------------------------------------------------------------|-----------------------------------------------|----------|-------------------------------|-------|
| 1     | 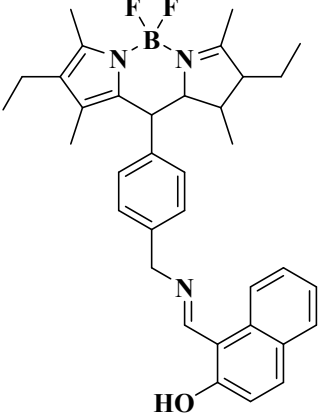                                          | CH <sub>3</sub> CN: H <sub>2</sub> O<br>(8:2) | 1280     | 2:1                           | 1     |
| 2     |  <p>3. R= CH<sub>3</sub><br/>4. R= H</p> | H <sub>2</sub> O: MeOH<br>(1:1)               | 5360     | 1:1                           | 2     |
| 3     |                                                                                                                            | 3970                                          | 1:1      |                               |       |
| 4     |                                         | DMSO: H <sub>2</sub> O<br>(4:1)               | 800      | 1:2                           | 3     |
| 5     |                                         | EtOH: water<br>(1:2)                          | 3000     | 2:1                           | 4     |

|    |                                                                                     |                                                                                |        |     |              |
|----|-------------------------------------------------------------------------------------|--------------------------------------------------------------------------------|--------|-----|--------------|
| 6  | 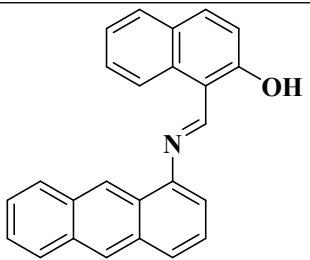   | CH <sub>3</sub> CN                                                             | 2050   | 2:1 | 5            |
| 7  |    | DMF: H <sub>2</sub> O<br>(3:7)                                                 | 1350   | 1:2 | 6            |
| 8  |    | -                                                                              | 155530 | 1:2 | 7            |
| 9  |   | HEPES<br>buffer (0.01<br>M, pH = 7.4,<br>containing<br>50% CH <sub>3</sub> CN, | 5800   | -   | 8            |
| 10 |  | H <sub>2</sub> O-CH <sub>3</sub> CN<br>(2:8)                                   | 1030   | 1:1 | 9            |
| 11 |  | EtOH-H <sub>2</sub> O<br>(1:1)                                                 | 493    | 1:1 | This<br>work |

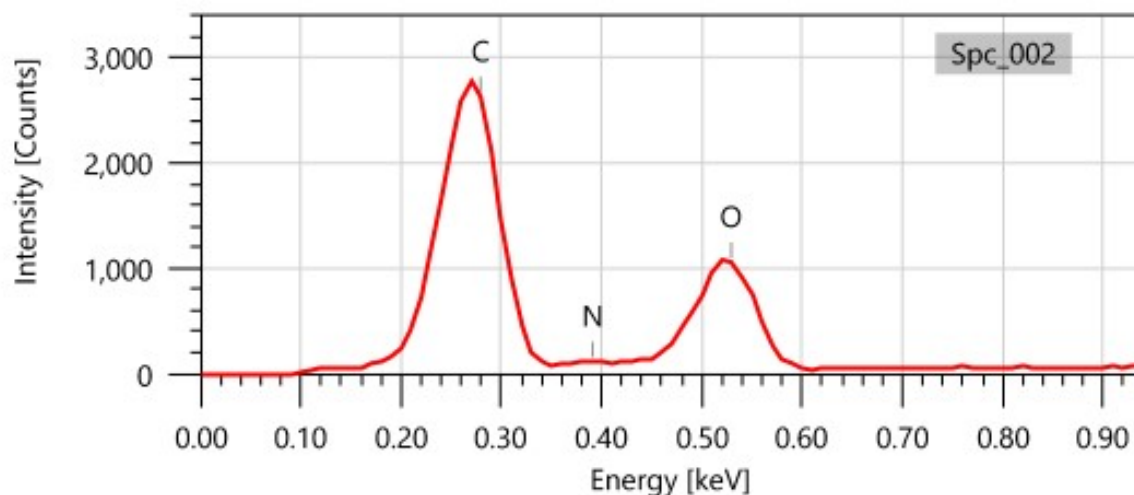

a

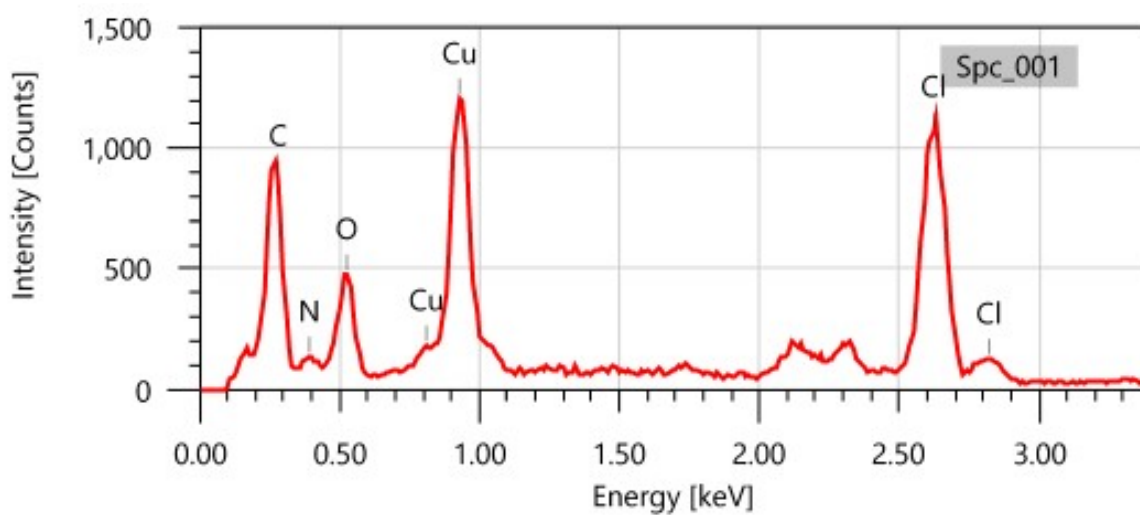

b

Fig S15. a) EDX data of QHS, b) EDX data of QHS in combination with CuCl<sub>2</sub>.

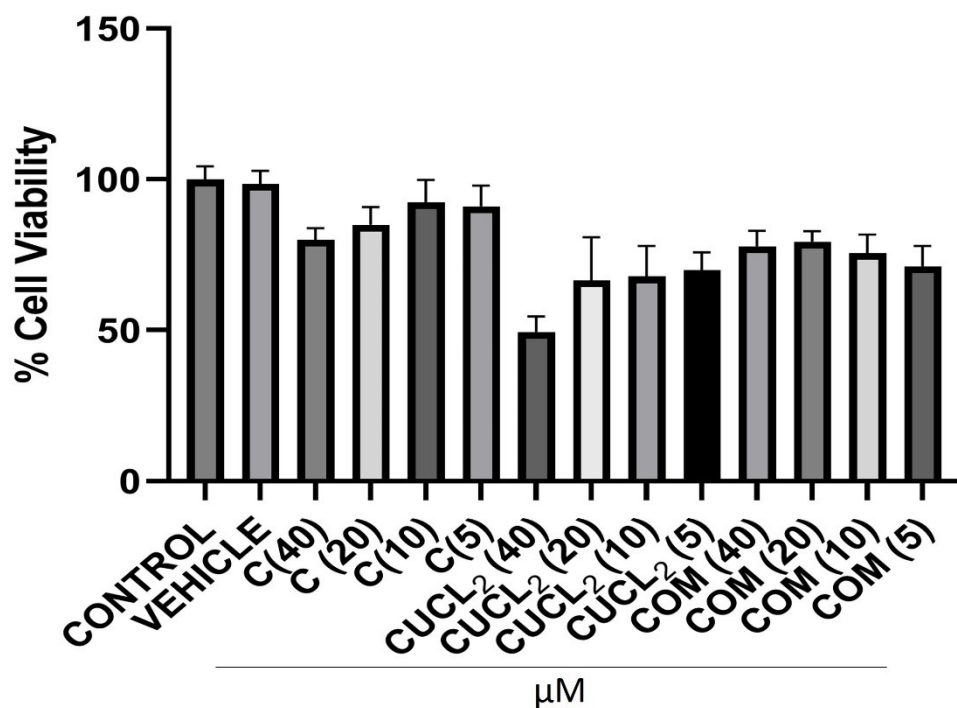

Fig S16. Cell viability assay at 6h for QHS (C) and copper chloride and their combinations of different concentrations denoted by  $\mu\text{M}$  respectively.

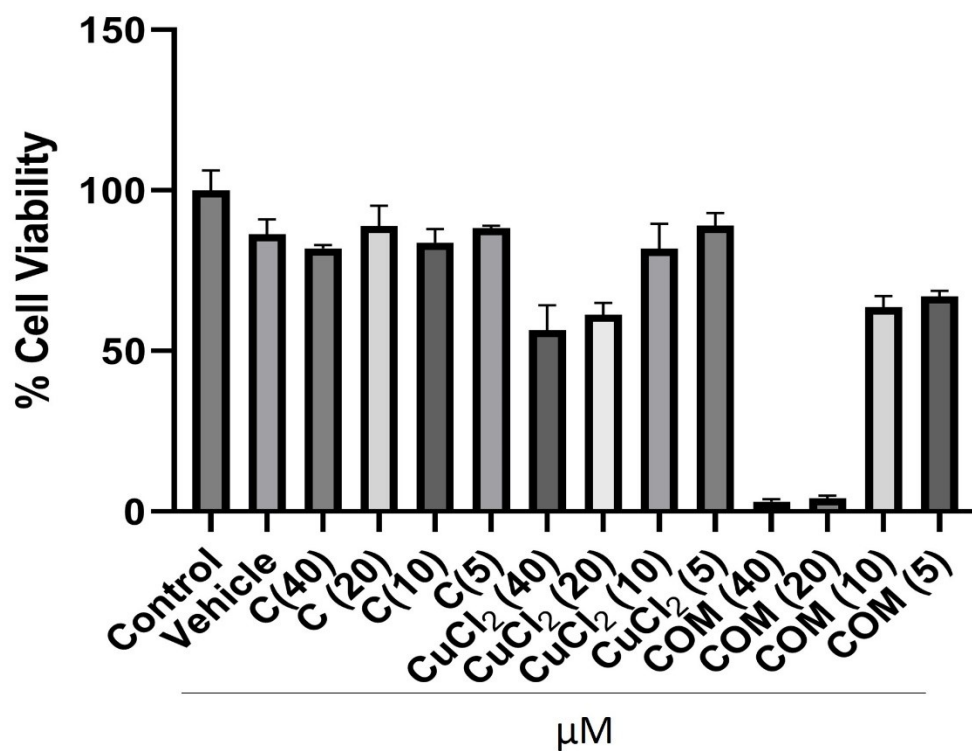

Fig S17. Cell viability assay at 24h for QHS (C) and copper chloride and their combinations of different concentrations denoted by  $\mu\text{M}$  respectively.

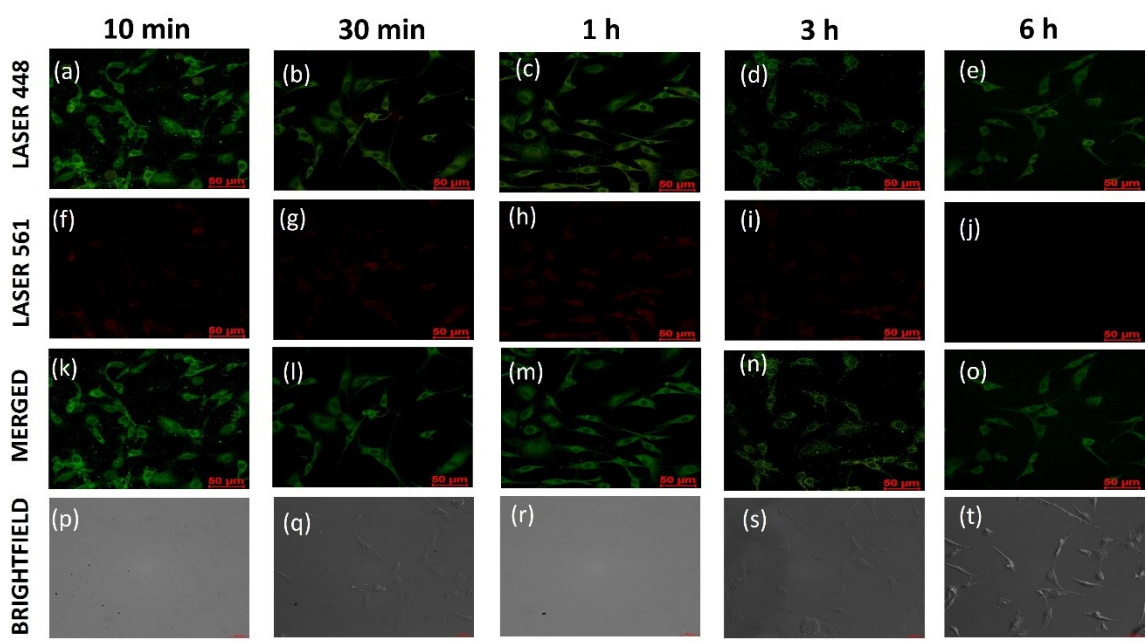

Fig S18. Epifluorescence images of C6 cells: (a-e) represents the fluorescent images of cells incubated with QHS only ( $5 \mu\text{M}$ ) for 10min, 30min, 1, 3 and 6 hour respectively and excited at Laser 448, (f-j) are the images taken on Laser 561 for the same treatment and (k-o) are there merged images and (p-t) are images taken at 40X. Scale Bar:  $50 \mu\text{m}$ .

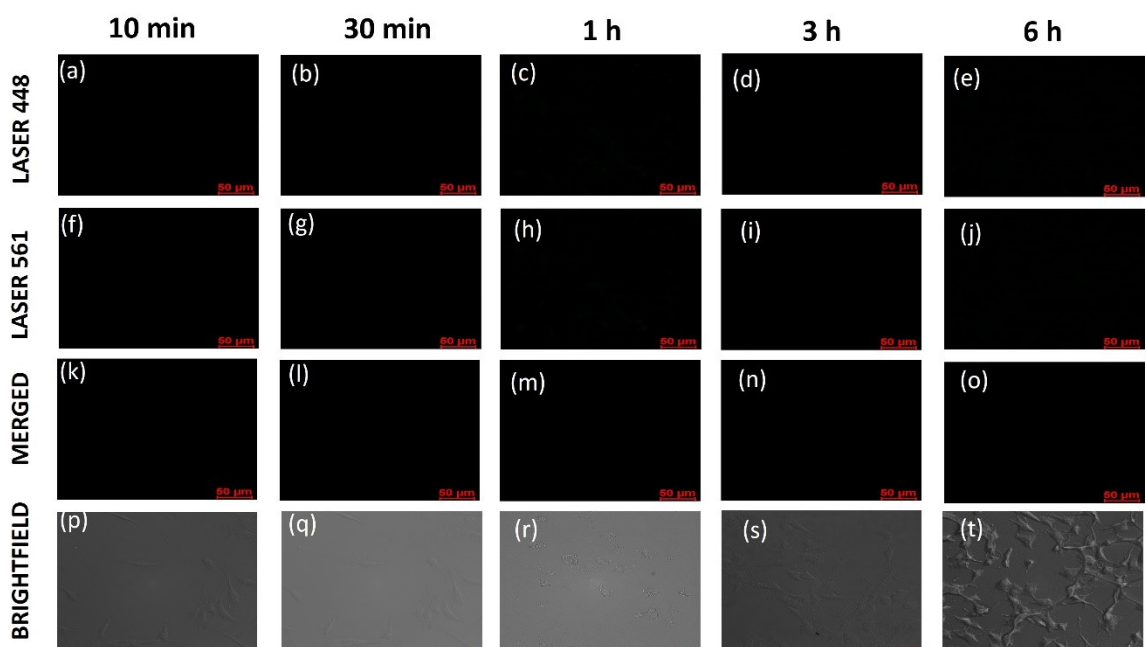

Fig S19. Epifluorescence images of C6 cells: (a-e) represents the fluorescent images of cells incubated with  $\text{CuCl}_2$  only ( $5 \mu\text{M}$ ) for 10min, 30min, 1, 3 and 6 hour respectively and excited at Laser 448, (f-j) are the images taken on Laser 561 for the same treatment and (k-o) are there merged images and (p-t) are images taken at 40X. Scale Bar:  $50 \mu\text{m}$ .

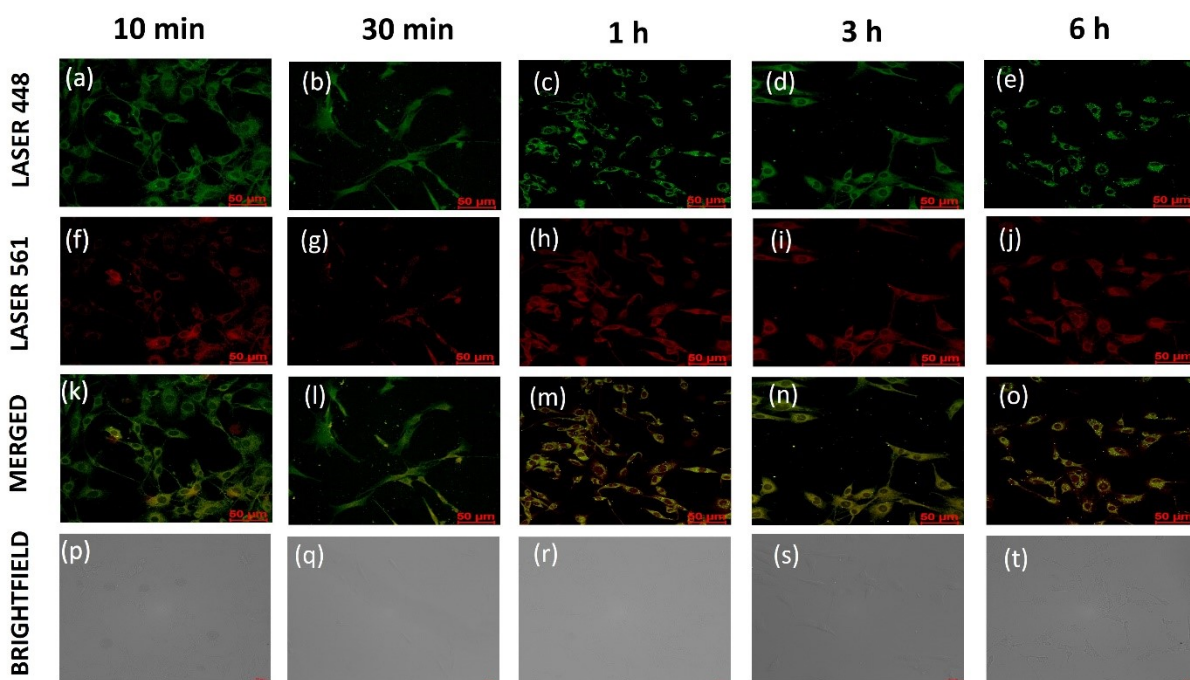

Fig S20. Epifluorescence images of C6 cells: (a-e) represents the fluorescent images of cells incubated with QHS and  $\text{CuCl}_2$  combination ( $5 \mu\text{M}$ ) for 10min, 30min, 1, 3 and 6 hour respectively and excited at Laser 448, (f-j) are the images taken on Laser 561 for the same treatment and (k-o) are there merged images and (p-t) are images taken at 40X. Scale Bar:  $50 \mu\text{m}$ .

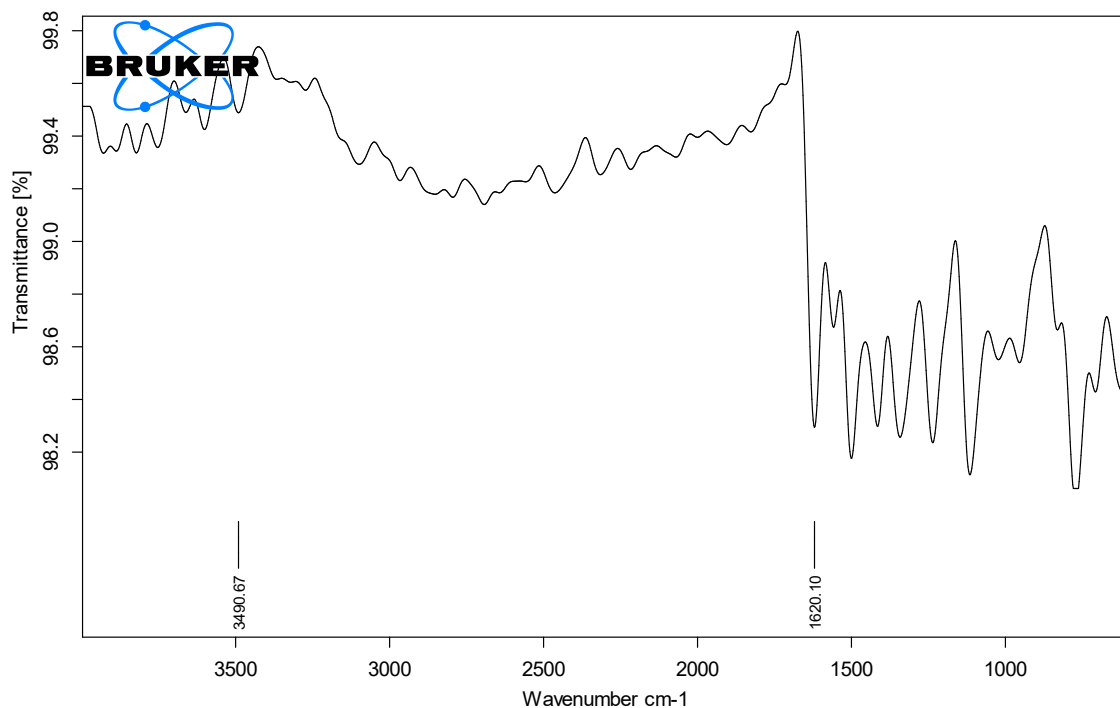

Fig S21. FTIR spectra of QHS.

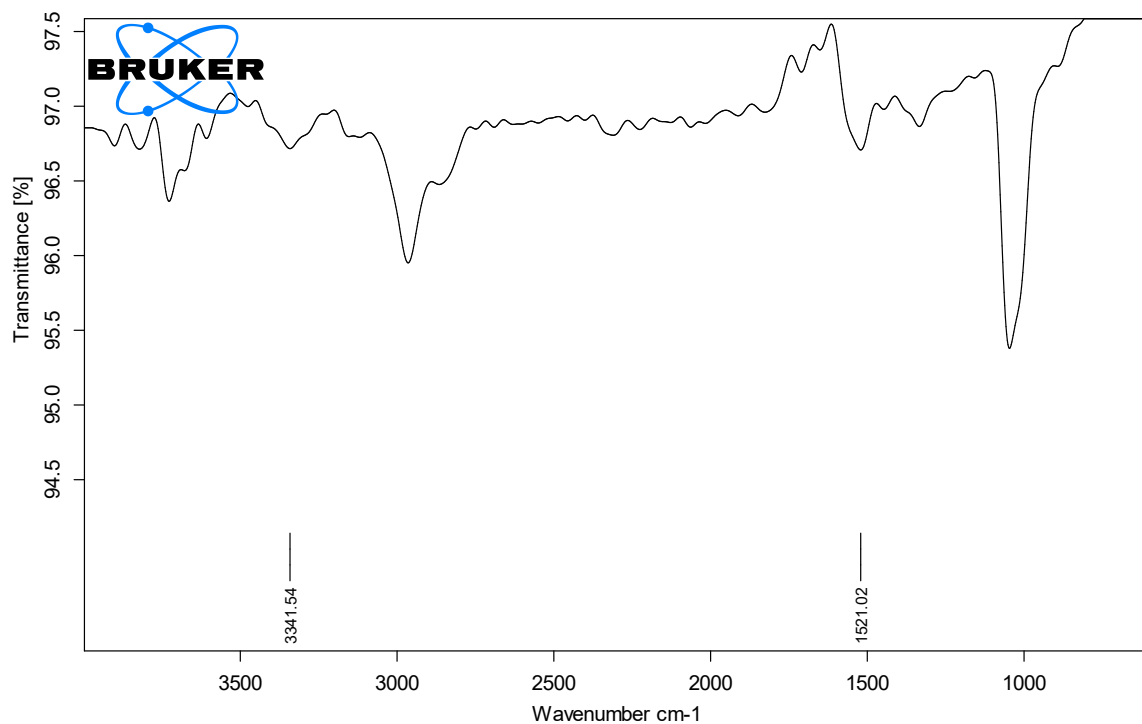

Fig S22. FTIR spectra of QHS in combination of Cu (II).

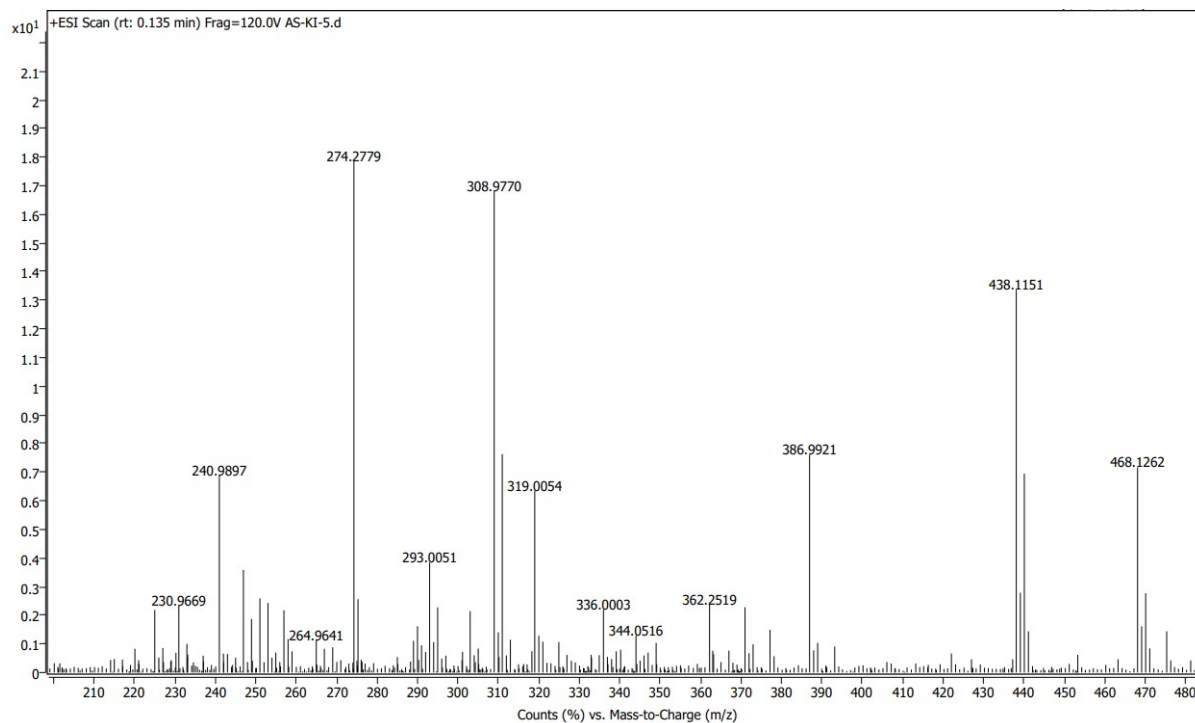

Figure S23. Mass spectra of QHS + Cu (II) complex.

## References

- (1) Baslak, C.; Kursunlu, A. N. A Naked-Eye Fluorescent Sensor for Copper(I) Ions Based on a Naphthalene Conjugate Bodipy Dye. *Photochem. Photobiol. Sci.* **2018**, *17* (8), 1091–1097. <https://doi.org/10.1039/c8pp00137e>.
- (2) Chen, Y.; Zhao, L.; Jiang, J. The Naphthoate-Modifying Cu<sup>2+</sup>-Detective Bodipy Sensors with the Fluorescent ON-OFF Performance Unaffected by Molecular Configuration. *Spectrochim. Acta - Part A Mol. Biomol. Spectrosc.* **2017**, *175*, 269–275. <https://doi.org/10.1016/j.saa.2016.12.034>.
- (3) Aarjane, M.; Slassi, S.; Amine, A. Novel Highly Selective and Sensitive Fluorescent Sensor for Copper Detection Based on N-Acylhydrazone Acridone Derivative. *J. Mol. Struct.* **2020**, *1199*, 126990. <https://doi.org/10.1016/j.molstruc.2019.126990>.
- (4) Said, A. I.; Georgiev, N. I.; Bojinov, V. B. The Simplest Molecular Chemosensor for Detecting Higher PHs, Cu<sup>2+</sup> and S<sup>2-</sup> in Aqueous Environment and Executing Various Logic Gates. *J. Photochem. Photobiol. A Chem.* **2019**, *371*, 395–406. <https://doi.org/10.1016/j.jphotochem.2018.11.029>.
- (5) Kaur, B.; Gupta, A.; Kaur, N. A Simple Schiff Base as a Multi Responsive and Sequential Sensor towards Al<sup>3+</sup>, F<sup>-</sup> and Cu<sup>2+</sup> Ions. *J. Photochem. Photobiol. A Chem.* **2020**, *389*, 112140. <https://doi.org/10.1016/j.jphotochem.2019.112140>.
- (6) Wang, J. X.; Xing, Z. Y.; Tian, Z. N.; Wu, D. Q.; Xiang, Y. Y.; Li, J. L. A Dual-Functional Probe for Sensing PH Change and Ratiometric Detection of Cu<sup>2+</sup>. *Spectrochim. Acta - Part A Mol. Biomol. Spectrosc.* **2020**, *235*, 118318. <https://doi.org/10.1016/j.saa.2020.118318>.
- (7) Sie, Y. W.; Li, C. L.; Wan, C. F.; Yan, H.; Wu, A. T. A Novel Fluorescence Sensor for Dual Sensing of Hg<sup>2+</sup> and Cu<sup>2+</sup> Ions. *J. Photochem. Photobiol. A Chem.* **2018**, *353*, 19–25. <https://doi.org/10.1016/j.jphotochem.2017.11.003>.
- (8) Ahmed, N.; Zareen, W.; Zhang, D.; Yang, X.; Ye, Y. Irreversible Coumarin Based Fluorescent Probe for Selective Detection of Cu<sup>2+</sup> in Living Cells. *Spectrochim. Acta - Part A Mol. Biomol. Spectrosc.* **2022**, *264*, 120313.



<https://doi.org/10.1016/j.saa.2021.120313>.

- (9) Farhi, A.; Firdaus, F.; Saeed, H.; Mujeeb, A.; Shakir, M.; Owais, M. A Quinoline-Based Fluorescent Probe for Selective Detection and Real-Time Monitoring of Copper Ions-a Differential Colorimetric Approach. *Photochem. Photobiol. Sci.* **2019**, *18* (12), 3008–3015. <https://doi.org/10.1039/c9pp00247b>.
